# Supplementary material for: The Medicago truncatula Vacuolar iron Transporter‐Like proteins VTL4 and VTL8 deliver iron to symbiotic bacteria at different stages of the infection process
Source: PubMed Central journal article supplement (PMC7540006; doi:10.1111/nph.16735), 2020-07-16
Supplement: NPH-228-651-s001.pdf [file NPH-228-651-s001.pdf]

## **New Phytologist Supporting Information**

Article title: **The *Medicago truncatula* Vacuolar iron Transporter-Like proteins VTL4 and VTL8 deliver iron to symbiotic bacteria at different stages of the infection process**

Authors: Jennifer H. Walton, Gyöngyi Kontra-Kováts, Robert T. Green, Ágota Domonkos, Beatrix Horváth, Ella M. Brear, Marina Franceschetti, Péter Kaló and Janneke Balk

Article acceptance date: 27 May 2020

The following Supporting Information is available for this article:

**Fig. S1** Growth of wild-type, 13U and *vtl4* *Medicago truncatula* with and without nitrogen.

**Fig. S2** Cytology of infected cells in the 13U mutant.

**Fig. S3** Distribution of bacteroid cell sizes in nodules of wild type and the 13U mutant.

**Fig. S4** Nodule fresh weight of complemented 13U lines.

**Fig. S5** Regulation of *mbfA* expression by *IrrA* and iron.

**Fig. S6** Iron staining of nodules using Perls' reagent.

**Table S1** *Tnt1* insertions in *Medicago truncatula* lines NF17463 (*vtl4-1*) and NF21016 (*vtl4-2*).

**Table S2** Primers and other oligonucleotides.

**Table S3** Expression of *S. meliloti* genes involved in Fe homeostasis during nodule development.

**Methods S1** Additional information on Materials and Methods.

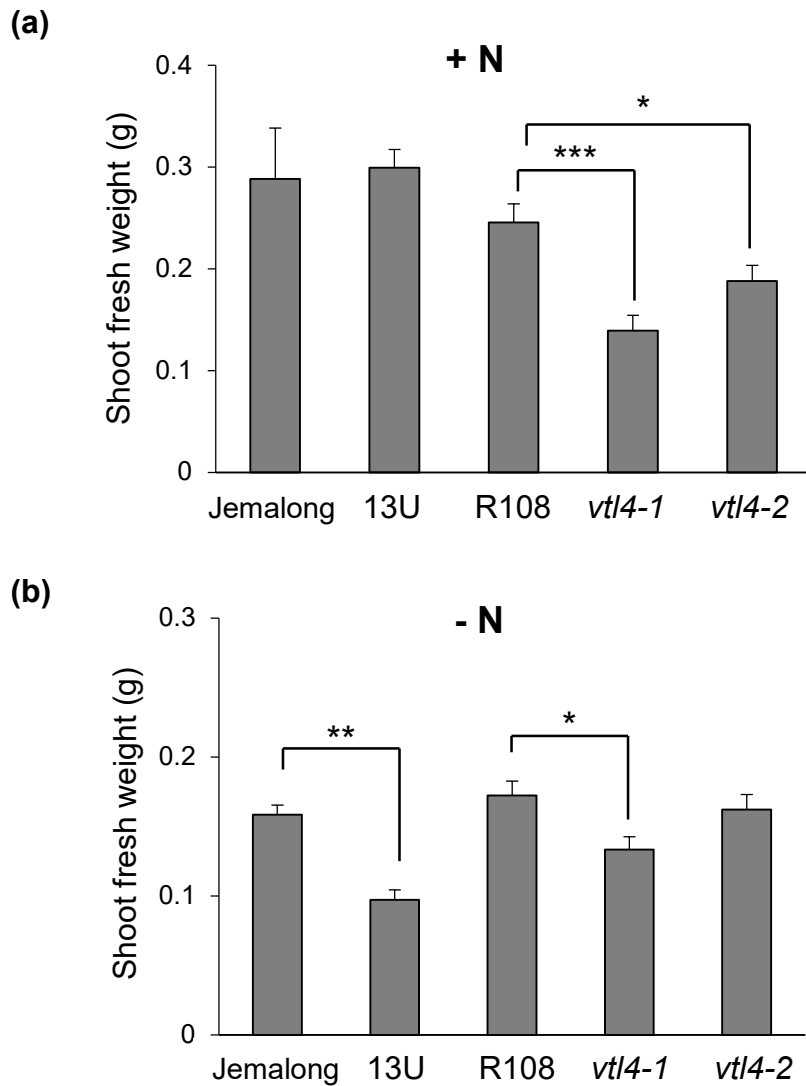

**Figure S1.** Growth of wild-type, 13U and *vtl4* *Medicago truncatula* with and without nitrogen.

(a) Shoot fresh weight of plants grown on zeolite saturated with Gibson liquid medium (Gibson and Nutman, 1960) containing 10 mM  $\text{NH}_4\text{NO}_3$  and watered with the same once a week for 3 weeks, then harvested at 4 weeks. (b) Shoot fresh weight of plants grown on zeolite and inoculated with *Sinorhizobium medicae* WSM419 (Jemalong, 13U) or *S. meliloti* 1021 (R108, *vtl4-1*, *vtl4-2*), harvested at 4 weeks. Bars represent the mean  $\pm$  SE. \* $P$ <0.1, \*\* $P$ <0.01, \*\*\* $P$ <0.001 Student's *t*-test. ( $n \geq 15$ )

Reference: **Gibson AH, Nutman PS 1960.** Studies on the physiology of nodule formation: with two figures in the text: a reappraisal of the effect of preplanting. *Annals of Botany* **24**: 420–433.

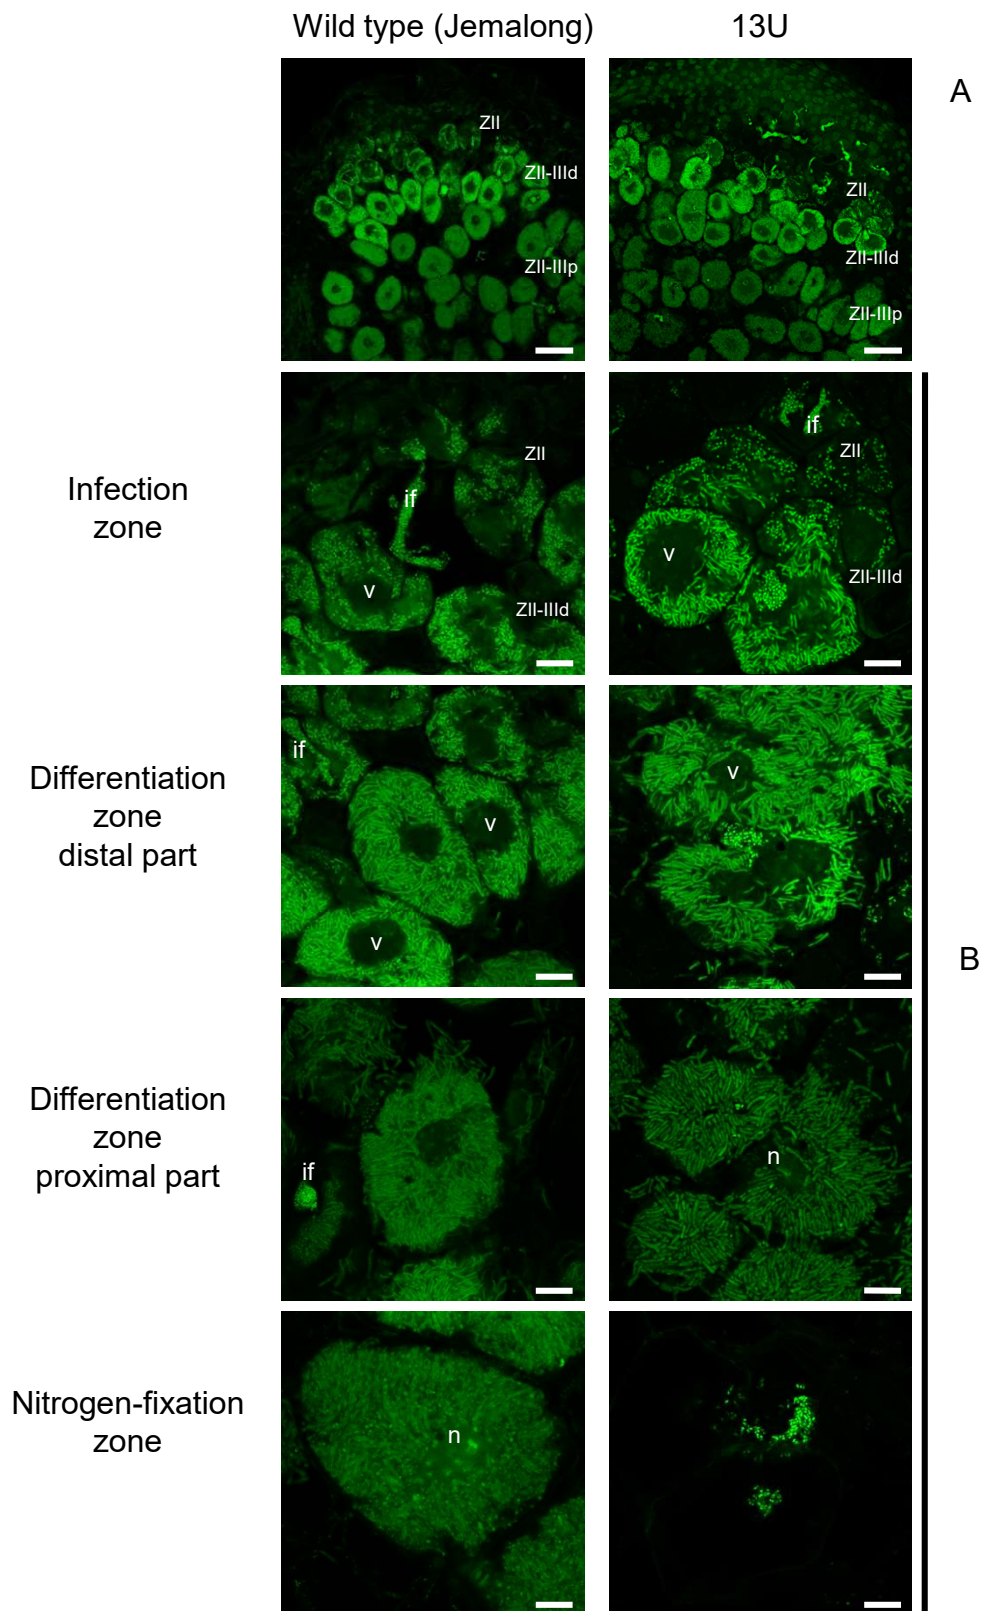

**Figure S2.** Cytology of infected cells in the 13U mutant.

Confocal images of SYTO13-stained sections of *Medicago truncatula* wild-type (Jemalong) and 13U nodules three weeks post inoculation with *Sinorhizobium medicae* WSM419. 13U nodules show disorganized disposition of elongated bacteroids in the differentiation zone and have a nitrogen-fixation zone devoid of symbiotic cells. Scale bars (A) 50  $\mu$ m, (B) 10  $\mu$ m.

ZII: infection zone, ZII-III d: differentiation zone distal part, ZII-III p: differentiation zone proximal part. if: infection thread, v: vacuole, n: nucleus.

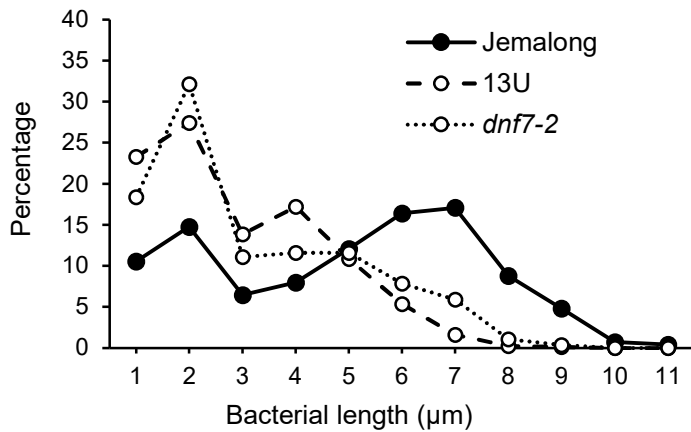

**Figure S3.** Distribution of bacteroid cell sizes in nodules of wild type and the 13U mutant. The 13U line and respective wild type of *Medicago truncatula* Jemalong were inoculated with *Sinorhizobium medicae* WSM419. The *dnf7-2* mutant defective in terminal bacteroid differentiation was analysed for comparison. Bacteria were isolated from the nodules, stained with propidium iodide, and imaged by confocal laser scanning microscopy. The lengths of at least 800 bacterial cells (wild type Jemalong and 13U) and 400 cells (*dnf7-2*) were measured and their relative distribution in size classes is shown.

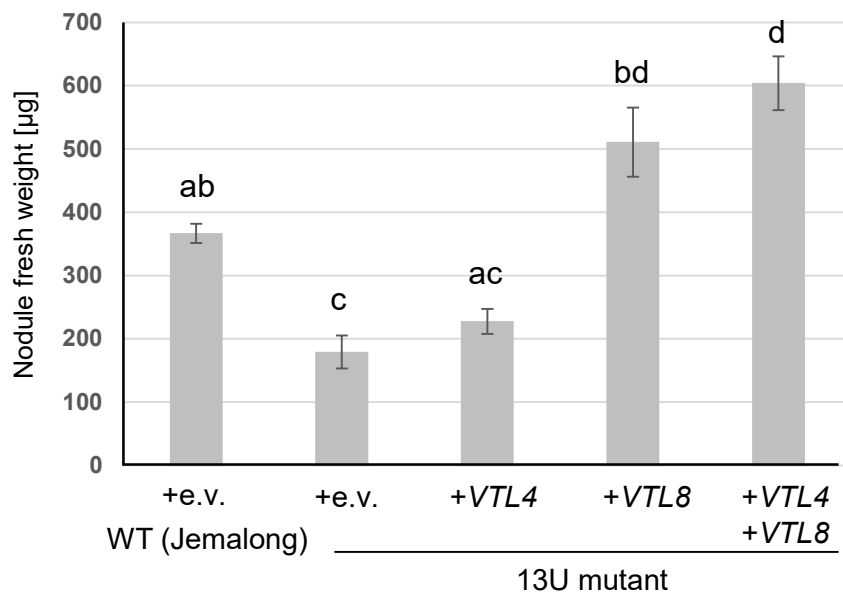

**Figure S4.** Nodule fresh weight of complemented 13U lines. For each root transformation, nodules were pooled to determine the total fresh weight, divided by the number of nodules. The values are the mean of 3 independent transformations  $\pm$  SE. Letters shared in common between the transformation indicate no significant difference (one-way ANOVA, Tukey's HSD tests).

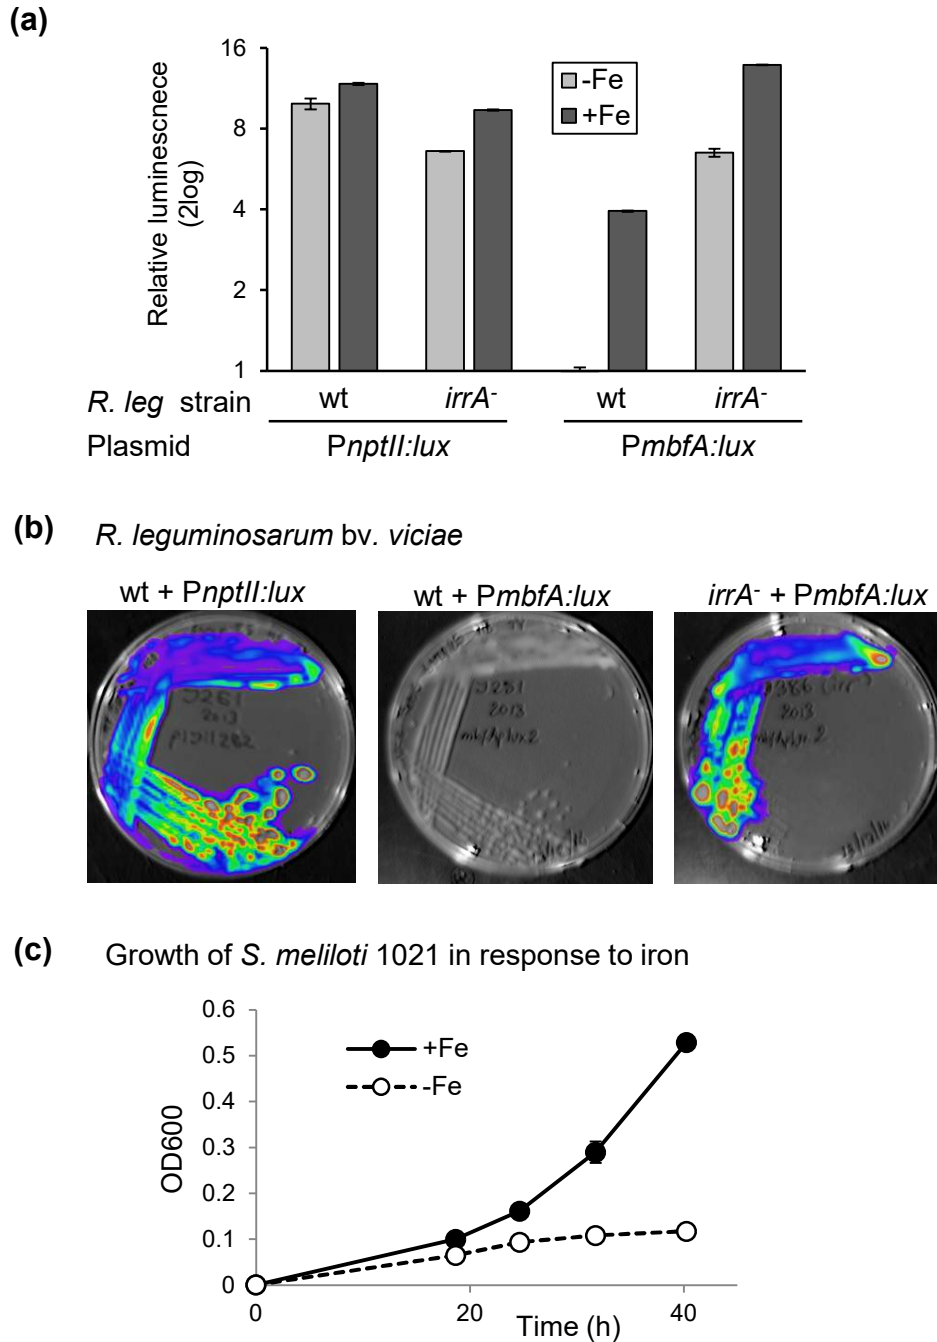

**Figure S5.** Regulation of *mbfA* expression by *IrrA* and iron.

(a) Expression of the *Sinorhizobium meliloti mbfA* promoter is regulated by the Iron response regulator *IrrA* in *Rhizobium leguminosarum*. The *PmbfA:lux* reporter plasmid was transferred by conjugation into a wild-type strain and an *irrA*<sup>-</sup> mutant strain of *R. leguminosarum* (Wrexler *et al.*, 2003; Todd *et al.*, 2006). Cells were grown in liquid medium with or without 40  $\mu$ M FeSO<sub>4</sub> (as indicated) and luminescence was measured at an OD600 ~ 1. Values represent the mean  $\pm$  SE of 3 bacterial cultures.

(b) *R. leguminosarum* strains as in (a), grown on TY agar plates (iron sufficiency). Luminescence was imaged with the NightOWL imaging system, and represented as an artificial colour scale from blue (low) to red (high).

(c) A typical growth curve of *S. meliloti* 1021 in UMS medium with and without iron, as used for studies of the *PmbfA:lux* reporter. Values represent the mean  $\pm$  SE of 3 bacterial cultures.

References: **Wexler M et al.**, *Microbiology* **149**: 1357–1365.

**Todd JD et al.**, *Molecular Genetics and Genomics* **275**: 564–577.

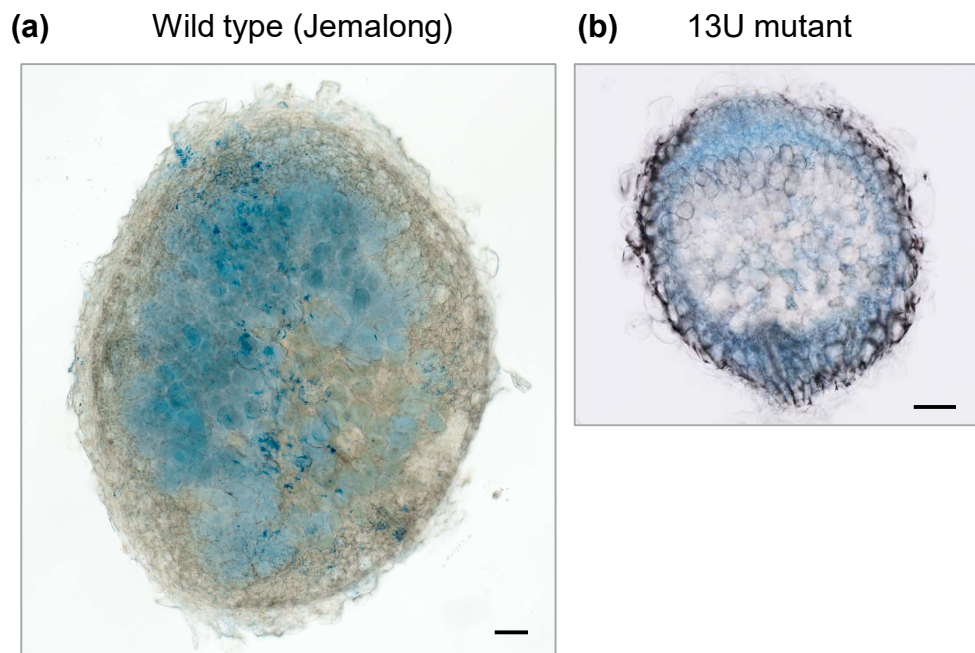

**Figure S6.** Iron staining of nodules using Perls' reagent. *Medicago truncatula* Jemalong nodules at 28 dpi from wild type (a) and 13U mutant plants (b) were stained for iron using potassium iron cyanide which gives a blue colour, also known as Perls' staining. To stain haem-iron in the infected cells of wild-type nodules, the ferricyanide salt was used instead of ferrocyanide, which results in a greenish-blue colour. The images are of 50-100  $\mu\text{m}$  sections made with a vibratome, imaged with a Zeiss AXIO Imager Z2 (left) or Leica DM600 microscope (right). Scale bars are 0.1 mm.

**Table S1 *Tnt1* insertions in *Medicago truncatula* lines NF17463 (*vtl4-1*) and NF21016 (*vtl4-2*)**

 Flanking sequence tags (FSTs) of *Tnt1* insertions listed on <https://medicago-mutant.noble.org/mutant/tnt1.php> (accessed on 10 December 2019).

**Line NF17463**

| FST Sequence ID | Start    | End      | Target | Nearest open reading frame                                                                                                                                                          |
|-----------------|----------|----------|--------|-------------------------------------------------------------------------------------------------------------------------------------------------------------------------------------|
| NF17463_high_1  | 33178439 | 33177673 | chr3   | <b>1.291 Kb upstream</b> of <b>Medtr3g073590</b> electron carrier/protein disulfide oxidoreductase<br>Coexpressed with genes in root-specific subnetwork                            |
| NF17463_high_2  | N/A      | N/A      | N/A    |                                                                                                                                                                                     |
| NF17463_high_3  | 9496496  | 9495891  | chr7   | <b>3.022 Kb upstream</b> of <b>Medtr7g028190</b> hypothetical protein                                                                                                               |
| NF17463_high_4  | 38043260 | 38042798 | chr7   | <b>0.355 Kb upstream</b> of <b>Medtr7g095150</b> ovate transcriptional repressor                                                                                                    |
| NF17463_high_5  | 55083794 | 55083370 | chr3   | <b>0.875 Kb upstream</b> of <b>Medtr3g117625</b> hypothetical protein<br><b>0.588 Kb upstream</b> of <b>Medtr3g117630</b> SAUR-like auxin-responsive family protein                 |
| NF17463_high_6  | 34669508 | 34669884 | chr4   | <b>In coding sequence (32 nt before Stop)</b> of <b>Medtr4g088035</b> LOB domain protein                                                                                            |
| NF17463_high_7  | 8484346  | 8484697  | chr2   | <b>2.083 Kb upstream</b> of <b>Medtr2g023920</b> IGR motif protein<br>Coexpressed with genes in roots specific coexpression subnetwork                                              |
| NF17463_high_8  | 8483856  | 8484081  | chr2   | <b>2.021 Kb upstream</b> of <b>Medtr2g023910</b> fungal proteinase A, aspartic proteinase superfamily protein; Coexpressed with genes in nodule-specific subnetwork                 |
| NF17463_low_1   | 33178439 | 33177673 | chr3   | Same as High_1                                                                                                                                                                      |
| NF17463_low_2   | N/A      | N/A      | N/A    |                                                                                                                                                                                     |
| NF17463_low_3   | 9496496  | 9495891  | chr7   | Same as High_3                                                                                                                                                                      |
| NF17463_low_4   | 37733541 | 37733004 | chr4   | <b>In coding sequence</b> of <b>Medtr4g094325</b> vacuolar iron transporter-like protein ( <b>VTL4</b> )<br>Differentially upregulated in nodules in symbiotic conditions vs. roots |
| NF17463_low_5   | 5026917  | 5027450  | chr5   | <b>In 5' UTR</b> of <b>Medtr5g014810</b> hypothetical protein                                                                                                                       |
| NF17463_low_6   | 38043260 | 38042798 | chr7   | Same as High_4                                                                                                                                                                      |
| NF17463_low_7   | 55083794 | 55083370 | chr3   | Same as High_5                                                                                                                                                                      |
| NF17463_low_8   | 32260156 | 32259760 | chr3   | <b>In 2<sup>nd</sup> exon</b> of <b>Medtr3g071870</b> cation/H <sup>+</sup> exchanger 3                                                                                             |
| NF17463_low_9   | 34669508 | 34669884 | chr4   | Same as High_6                                                                                                                                                                      |
| NF17463_low_10  | 8484346  | 8484697  | chr2   | Same as High_7                                                                                                                                                                      |
| NF17463_low_11  | 8483856  | 8484081  | chr2   | Same as High_8                                                                                                                                                                      |

**Line NF21016<sup>a</sup>**

| FST Sequence ID | Start    | End      | Target | Nearest open reading frame                                                                                                                                                                                 |
|-----------------|----------|----------|--------|------------------------------------------------------------------------------------------------------------------------------------------------------------------------------------------------------------|
| NF21016_high_1  | 42395878 | 42395404 | chr8   | <b>In 1st exon or in 1<sup>st</sup> intron of alternative transcript</b> of <b>Medtr8g100065</b> GRAM domain protein/<br>ABA-responsive-like protein; Coexpressed with genes in nodule-specific subnetwork |
| NF21016_high_10 | 1250651  | 1250893  | chr1   | <b>0.109 Kb upstream</b> of <b>Medtr1g009260</b> hypothetical protein                                                                                                                                      |
| NF21016_high_11 | 4367025  | 4367250  | chr6   | <b>9.599 Kb downstream</b> of <b>Medtr6g013530</b> circadian clock coupling factor ZGT                                                                                                                     |
| NF21016_high_12 | 53127876 | 53127655 | chr4   | <b>In 2<sup>nd</sup> intron</b> of <b>Medtr4g127790</b> lysine-tRNA ligase<br>Coexpressed with genes in nodule-specific subnetwork                                                                         |
| NF21016_high_13 | 38186924 | 38186837 | chr1   | <b>1.138 Kb upstream</b> of <b>Medtr1g085500</b> rhicadhesin receptor                                                                                                                                      |



|                |          |          |      |                                                                                                                                                                                                                                             |
|----------------|----------|----------|------|---------------------------------------------------------------------------------------------------------------------------------------------------------------------------------------------------------------------------------------------|
|                |          |          |      | <b>0.193 Kb downstream</b> of <b>Medtr1g085510</b> Pre-mRNA-splicing factor SLU7-like protein                                                                                                                                               |
| NF21016_high_2 | 8899086  | 8898661  | chr8 | <b>In 5<sup>th</sup> intron</b> of <b>Medtr8g024260</b> PRR response regulator<br>Coexpressed with genes in leaf-specific subnetwork                                                                                                        |
| NF21016_high_3 | 42089104 | 42089520 | chr1 | <b>In 3' UTR</b> of <b>Medtr1g093800</b> Clavata3/ESR (CLE) gene family member MtCLE18<br>Differentially downregulated in nodules in symbiotic conditions vs. roots.                                                                        |
| NF21016_high_4 | 30395194 | 30395584 | chr7 | <b>In 3<sup>rd</sup> exon</b> of <b>Medtr7g080000</b> WRKY family transcription factor                                                                                                                                                      |
| NF21016_high_5 | 41260717 | 41261096 | chr2 | <b>In the 5' UTR</b> of <b>Medtr2g096630</b> transmembrane protein, putative                                                                                                                                                                |
| NF21016_high_6 | 19056192 | 19056573 | chr5 | <b>In last (7<sup>th</sup>) exon</b> of <b>Medtr5g043350</b> polygalacturonase/glycoside hydrolase family protein                                                                                                                           |
| NF21016_high_7 | 1186129  | 1185804  | chr2 | <b>In 1<sup>st</sup> intron</b> of <b>Medtr2g007890</b> bidirectional sugar transporter                                                                                                                                                     |
| NF21016_high_8 | 4055352  | 4055228  | chr3 | <b>2.132 Kb downstream</b> of <b>Medtr3g014320</b> LRR and NB-ARC domain disease resistance protein                                                                                                                                         |
| NF21016_high_9 | 28957983 | 28957779 | chr1 | <b>3.526 Kb upstream</b> of <b>Medtr1g067220</b> hypothetical protein<br>Coexpressed with genes in leaf-specific subnetwork<br><b>3.391 Kb downstream</b> of <b>Medtr1g067230</b> replication A1-like protein, putative                     |
| NF21016_low_1  | 42395878 | 42395404 | chr8 | Same as High_1                                                                                                                                                                                                                              |
| NF21016_low_10 | 28957983 | 28957779 | chr1 | Same as High_9                                                                                                                                                                                                                              |
| NF21016_low_11 | 1250651  | 1250893  | chr1 | Same as High_10                                                                                                                                                                                                                             |
| NF21016_low_12 | 30101668 | 30101427 | chr4 | <b>0.149 Kb downstream</b> of <b>Medtr4g078180</b> hypothetical protein<br>Differentially downregulated in leaf with ammonium vs. roots with ammonium comparison<br><b>0.497 Kb downstream</b> of <b>Medtr4g078190</b> hypothetical protein |
| NF21016_low_13 | 4367025  | 4367250  | chr6 | Same as High_11                                                                                                                                                                                                                             |
| NF21016_low_14 | 53127876 | 53127655 | chr4 | Same as High_12                                                                                                                                                                                                                             |
| NF21016_low_15 | 38186924 | 38186837 | chr1 | Same as High_13                                                                                                                                                                                                                             |
| NF21016_low_2  | 37947006 | 37946688 | chr4 | <b>0.223 Kb upstream</b> of <b>Medtr4g094415</b> MAP kinase kinase kinase-like protein<br>Coexpressed with genes in leaf-specific subnetwork                                                                                                |
| NF21016_low_3  | 8899086  | 8898661  | chr8 | Same as High_2                                                                                                                                                                                                                              |
| NF21016_low_4  | 42089104 | 42089520 | chr1 | Same as High_3                                                                                                                                                                                                                              |
| NF21016_low_5  | 30395194 | 30395584 | chr7 | Same as High_4                                                                                                                                                                                                                              |
| NF21016_low_6  | 41260717 | 41261096 | chr2 | Same as High_5                                                                                                                                                                                                                              |
| NF21016_low_7  | 19056192 | 19056573 | chr5 | Same as High_6                                                                                                                                                                                                                              |
| NF21016_low_8  | 1186129  | 1185804  | chr2 | Same as High_7                                                                                                                                                                                                                              |
| NF21016_low_9  | 4055352  | 4055228  | chr3 | Same as High_8                                                                                                                                                                                                                              |

<sup>a</sup>The *Tnt1* insertion in Medtr4g094325 (VTL4) was identified by PCR screening and is not listed in the *Medicago* mutant database.



**Table S2 Primers and other oligonucleotides**

| Oligonucleotide              | Purpose                                                           | Sequence (5'-3')                                                                                               |
|------------------------------|-------------------------------------------------------------------|----------------------------------------------------------------------------------------------------------------|
|                              | Genotyping of Tnt lines                                           | TCCTTGTGGATTGGTAGCC<br>CAGTGAACGAGCAGAACCTGTG                                                                  |
| VTL4F (JW65)<br>VTL4R (JW83) | Genotyping of <i>vtl4</i> mutants                                 | CAACCTCCAACCACACTCT<br>TGTACTTCATGGCTTCTCTTGG                                                                  |
| JW3<br>JW4                   | RT-PCR of <i>VTL4</i>                                             | AGCTGCTTTGTTAGGAGCCA<br>ATGTCTTCATGCACAGCTCCA                                                                  |
| JW98<br>JW99                 | RT-PCR of <i>VTL8</i>                                             | GATTATTGGCAAAGGGCTCA<br>ATAGCCATAGCCATCCATCCACCAAG                                                             |
| JW5<br>JW6                   | RT-PCR of <i>ACTIN</i> (Medtr3g095530)                            | TCAATGTGCCTGCCATGTATGT<br>ACTCACACCGTCACCAGAATCC                                                               |
| VTL4RTqF<br>VTL4RTqR         | RT-qPCR of <i>VTL4</i>                                            | ACCACCAGAAATGAGAAAGAGC<br>TTGAAGTTGGCCACCTCTGA                                                                 |
| SEN1qRTF<br>SEN1qRTR         | RT-qPCR of <i>VTL8</i>                                            | GGCTTTGGTTGTGTTGGAGG<br>GCCATAGCCATCCATCCACC                                                                   |
| UPL7qRTF<br>UPL7qRTR         | RT-qPCR reference gene<br>(Medtr7g103210)                         | CCAGTTGTTCTCGTGGTCCATT<br>CCTCCAATTGTCGCCCAA                                                                   |
| mbfAQF<br>mbfAQR             | RT-qPCR of <i>mbfA</i>                                            | AAGAGGACGATGGACGCATC<br>CTCTCCTCCTCCGCCATTTCT                                                                  |
| gapAQF<br>gapAQR             | RT-qPCR reference gene<br>( <i>S. meliloti gapA</i> , SMC03979)   | GAAATCAACGCGGCCATCAA<br>CGGATCGTGGTTGAAGTCGA                                                                   |
| FL3                          | Linker peptide<br>LGGGGSGGGGSGGGGSAAA                             | CTTGGTGGAGGTGGATCTGGTGGAGGTGG<br>ATCAGGTGGAGGTGGATCTGCTGCAGCT                                                  |
|                              | Cloning of <i>MtVTL4</i> into pYES2<br>(Two-step PCR for Gateway) | AAAAGCAGGCTCCATGGCTTCTCTTGGTAACCATAAT<br>AGAAAGCTGGGTATCAAAGTGAACATATAGCCAACGAA                                |
| M39<br>M40                   | Cloning of <i>MtVTL8</i> into pYES2<br>(One-step PCR for Gateway) | ggggacaagtttgtacaaaaaagcaggctcgATGGCCGTTGGTACAATATG<br>ggggaccacttttgtacaagaagctgggtaTCAAATTTCAAATCCAAACC      |
|                              | Cloning of <i>AtVIT1</i> into pYES2<br>(One-step PCR for Gateway) | ggggacaagtttgtacaaaaaagcaggcttaATGTCGTCGGAGGAAGATAAGA<br>ggggaccacttttgtacaagaagctgggtaCTAATGTTGCACAACCTTTAGCC |
| mbfANEWF<br>mbfANEWR         | Cloning of <i>S. meliloti mbfA</i> promoter                       | ACTGGGTACCGACAAGGTGGTGGCGATGTA<br>ACTGGGATCCAATGCGTCCATCGTCTCTCTTC                                             |
| ICESDM2F                     | Mutagenesis of <i>mbfA</i> ICE box                                | CATCACGAAGCCTTCTGAAGCTTAATTCTAATTAGGCGCCGATTCATGACGCG                                                          |

|                                                                                                                                                  |                                                         |                                                                                                                                                                                                                                                                                |
|--------------------------------------------------------------------------------------------------------------------------------------------------|---------------------------------------------------------|--------------------------------------------------------------------------------------------------------------------------------------------------------------------------------------------------------------------------------------------------------------------------------|
| ICESDM2R                                                                                                                                         |                                                         | CGCGTCATGAATCGGCGCCTAATTAGAATTAAGCTTCAGAAGGCTTCGTGATG                                                                                                                                                                                                                          |
| KGWSpeI_325pr_F<br>KGWAatII_325UTR_R                                                                                                             | Cloning of <i>VTL4</i> into vector pKGW-R               | aggcgggccgcactagTCGTGACGGAAAACATGTAGGG<br>gcaccaaccacaacgcagctTGAGCTGAATTTTTGAGCTGACTATAC                                                                                                                                                                                      |
| KGWSpeI_335pr_F<br>KGWAatII_335UTR_R                                                                                                             | Cloning of <i>VTL8</i> into vector pKGW-R               | aggcgggccgcactagCCAAACGACATGGCATATAGC<br>gcaccaaccacaacgcagctCATATAAACCTCCCGAAACCTC                                                                                                                                                                                            |
| 325prom_F<br>335_R&325prom_hom                                                                                                                   | Cloning of <i>VTL8</i> + <i>VTL4</i> into vector pKGW-R | TCGTGACGGAAAACATGTAGGG<br>TGTTTTCCGTACGACATATAAACCTCCCGAAACCTC                                                                                                                                                                                                                 |
| h2_16e5_F<br>h2_16e5_R<br>h2_17n4b_F<br>h2_17n4b_R<br>h2_68o3b_F<br>h2_68o3b_R<br>mth2-49e15_F<br>mth2-49e15_R<br>mth2_72d18e_F<br>mth2_72d18e_R | Fine mapping of 13U                                     | CTGCAATTAACAATAAATGGTTAGAGT<br>CTACCAAACAAAAGCCTAGACTTCTT<br>CAACGCCGGGTAAATACACT<br>TTGTTTTTGTGTTTCGCACA<br>GGTTCAACAATCAAATGAGCTG<br>GTGAGCAGAAGCATAACACGC<br>AACCCAGACACCCCACT<br>GCACGCATGCACACTCAT<br>TGACCAATGAAGCGCAATAC<br>TATTAACAATCCCGACCGC                         |
| BG646574_F2<br>BG646574_R2<br>SYN24_F<br>SYN24_R<br>TC173960_F1<br>TC173960_R1b<br>TC178276_F1<br>TC178276_R1<br>TC182270_F1<br>TC182270_R1      | Delimiting the 13U deletion                             | GAGTCAAACGAAGTAAAGGTT<br>ACTCAAACCTGGAACCTTGAC<br>TCAACTCAACAATGCTTACTATGGC<br>AAAGAGGAAACCAATGATTGCTACT<br>TCACCATTGCCCACTGATGCTA<br>ACAACCTTATTCCAGGAGTTACC<br>GGCAAAGGGCTCAATGGCTTCGC<br>GCACCAACACCTCCAAACACAAC<br>TTCTTTGCCTTTTTATTTTTTCGTTT<br>TGGTTCAGGTCCTTCATTAGTCTTG |
| TC192817_F1<br>TC192817_R1<br>CA919468_F1<br>CA919468_R1<br>TC191603_F1<br>TC191603_R1                                                           | Detecting borders of the 13U deletion                   | CAACAAACCAAAGACCAGCATAGG<br>AGGGATGGTGGTAGTCGTGGAGATT<br>AATGAATGACCCTATCTCACGGA<br>ATTTCTACATCTGCACTTGGCTT<br>TCAGGCTTCTCACTATGGCTTATT<br>CACTGACCCAGAGACCACAATACC                                                                                                            |

**Table S3 Expression of *S. meliloti* genes involved in Fe homeostasis during nodule development**

**Data from Roux B *et al.* 2014.** An integrated analysis of plant and bacterial gene expression in symbiotic root nodules using laser-capture microdissection coupled to RNA sequencing. *Plant Journal* **77**: 817–837.

| <i>Medicago truncatula</i>                     |               | Total reads | Percentage (%) expression |      |      |      |      |
|------------------------------------------------|---------------|-------------|---------------------------|------|------|------|------|
|                                                |               |             | FI (zone I)               | FIId | FIIp | IZ   | ZIII |
| VTL4                                           | Medtr4g094325 | 40662.4     | 3.9                       | 44.1 | 8.6  | 16.7 | 26.8 |
| VTL8                                           | Medtr4g094335 | 150938.1    | 0.1                       | 0.2  | 7.3  | 68.6 | 23.8 |
|                                                |               |             |                           |      |      |      |      |
| <i>Sinorhizobium meliloti</i>                  |               |             |                           |      |      |      |      |
| <i>bfr</i> (putative bacterioferritin)         | SMc03786      | 6959.4      | 21.6                      | 24.6 | 22.7 | 26.2 | 4.9  |
| <i>fecI</i> (Fe citrate transport, regulation) | SMc04203      | 188.5       | 13.8                      | 16.5 | 32.2 | 21.2 | 16.3 |
| <i>fecR</i>                                    | SMc04204      | 643.0       | 2.0                       | 11.4 | 40.6 | 24.3 | 21.7 |
| <i>hmuV</i> (hemin uptake)                     | SMc01510      | 556.0       | 20.5                      | 30.5 | 25.3 | 11.0 | 12.9 |
| <i>hmuU</i>                                    | SMc01511      | 1240.2      | 24.3                      | 26.1 | 27.8 | 11.9 | 9.9  |
| <i>hmuT</i>                                    | SMc01512      | 1655.5      | 25.4                      | 22.1 | 33.5 | 14.2 | 4.9  |
| <i>hmuS</i>                                    | SMc01513      | 3746.6      | 32.6                      | 18.4 | 29.9 | 15.3 | 3.8  |
| <i>Irr</i> (iron response regulator)           | SMc00329      | 1122.6      | 12.9                      | 17.8 | 31.8 | 30.0 | 7.6  |
| <i>mbfA</i> (membrane-bound ferritin)          | SMc00359      | 6289.4      | 1.9                       | 3.0  | 38.7 | 48.0 | 8.4  |
| <i>rhbA</i> (rhizobactin biosynthesis)         | SMa2400       | 391.5       | 70.0                      | 4.6  | 5.3  | 5.6  | 14.5 |
| <i>rhbB</i>                                    | SMa2402       | 391.5       | 70.0                      | 4.6  | 5.3  | 5.6  | 14.5 |
| <i>rhbC</i>                                    | SMa2404       | 961.7       | 32.3                      | 17.5 | 25.2 | 15.1 | 10.0 |
| <i>rhbD</i>                                    | SMa2406       | 515.2       | 49.8                      | 11.6 | 8.6  | 12.2 | 17.8 |
| <i>rhbE</i>                                    | SMa2408       | 131.6       | 66.0                      | 7.2  | 8.0  | 7.9  | 10.8 |
| <i>rhbF</i>                                    | SMa2410       | 955.8       | 26.4                      | 14.7 | 14.9 | 8.9  | 35.1 |
| <i>rhtA</i> (rhizobactin transporter)          | SMa2414       | 3406.1      | 65.0                      | 10.6 | 4.9  | 6.2  | 13.3 |
| Putative Fe/heme transporter                   | SMc04205      | 461.9       | 11.1                      | 8.6  | 16.0 | 23.4 | 41.0 |

## **Methods S1 Additional information on Materials and Methods**

### **The *Medicago truncatula* Vacuolar iron Transporter-Like proteins VTL4 and VTL8 deliver iron to symbiotic bacteria at different stages of the infection process**

Authors: Jennifer H. Walton, Gyöngyi Kontra-Kováts, Robert T. Green, Ágota Domonkos, Beatrix Horváth, Ella M. Brear, Marina Franceschetti, Péter Kaló and Janneke Balk

#### **Gene expression analysis**

Total RNA from plant tissue was extracted using the RNeasy Mini kit (QIAGEN, Germany) and treated with DNase (Turbo DNase kit, Agilent). RNA from bacteria was isolated using RNeasy Protect Bacteria Reagent and the RNeasy Mini kit, both from QIAGEN, following manufacturer's protocols. cDNA was produced using Thermo SuperScript II Reverse Transcriptase and an anchored oligo-dT primer, and used as template for either standard RT-PCR with products separated by agarose gel electrophoresis, or for quantitative RT-qPCR. RT-qPCR reactions were made using SensiFAST master-mix (Bioline), each with 20 ng of cDNA. Reactions were measured in a Bio-Rad CFX-96 real-time PCR system and cycled as per the Bioline protocol. The expression values of *VTL4* and *VTL8* were normalized to that of the *UPL7* gene (*UBIQUITIN PROTEIN LIGASE 7*), and the expression of *mbfA* was normalized to *gapA* expression, see Table S2 for primers.

#### **Acetylene reduction assay**

The activity of nitrogenase was assayed by testing the capacity of nodules to reduce acetylene to ethylene, another reaction catalyzed by the enzyme. Nodulated roots were harvested 28 dpi and those of two or three single plants were placed in 1.8 ml glass vials sealed with a rubber cap. To start with, dilutions of ~99.5% ethylene were injected into a Shimadzu 2010 GC gas chromatograph using a HP-PLOTQ (30 m x 320 µm x 20 µm) column to generate a calibration curve. Next, 180 µl of acetylene was injected into each vial containing detached nodulated roots. After incubation at room temperature for at least 2 h, 100 µl gas samples were taken and injected into the gas chromatograph to determine the amount of ethylene produced. After the assay, nodules were picked off the roots and

weighed. The acetylene reduction activity (ARA) was calculated as picomole of ethylene per min per mg nodule weight.

### **Measuring bacteroid length**

About 80 mg nodules were homogenized in 300  $\mu$ L ice-cold PBS, pH 7.4. Cell debris was removed by centrifugation (500 x *g*, 10 min, 4°C) and supernatant was filtered through a CellTrics nylon filter of mesh size 50  $\mu$ m (Sysmex, Partec GmbH Görlitz, Germany). The flow-through was filtered again through 20  $\mu$ m mesh sized nylon and bacterial cells were pelleted by centrifugation (5000 x *g*, 15 min, 4°C). The pellet was washed and suspended in 20  $\mu$ L PBS. 3  $\mu$ L suspensions of bacteria were dropped on microscope slides and 1  $\mu$ L propidium-iodide (20  $\mu$ M) was added. Following 1 h incubation, at least five images per line were taken with a Leica TCS SP8 confocal laser scanning microscope with objective lens: HCX PL FLUOTAR 10x/0.30 (dry, NA:0.3), PL FLUOTAR 40x/1.00 OIL. The detection range for the PI channel was 561-660 nm. The length of  $\geq 2500$  bacterial cells from wild-type R108 and mutant *vtl4* alleles;  $\geq 800$  from wild-type Jemalong and mutant 13U; and  $\geq 400$  from the *dnf7-2* mutant (Horvath *et al.*, 2015) was measured using ImageJ software. The relative distribution of different bacteroid size was plotted.

### **Yeast complementation**

The yeast strain DY150, which is derived from W303, was used as wild type. The  $\Delta$ *ccc1* strain in this background carries a genomic deletion of *CCC1*, initially identified as *Cross-Complements Ca<sup>2+</sup>1*, but later shown to mediate vacuolar iron transport (Li *et al.*, 2001). Plant genes were cloned into shuttle vector pYES2 under the control of the *GAL1* promoter for galactose-inducible expression. The coding sequence of Arabidopsis *VIT1* (*AT2G01770*) was used as a positive control for functional complementation (Kim *et al.*, 2006). Yeast were transformed using the lithium-acetate method and positive transformants were selected on synthetic dropout medium lacking uracil (DSCK102, Formedium, Hunstanton UK) with glucose as carbon source (SD). Overnight cultures of selected colonies were grown in SD-Ura, then spotted onto 2% (w/v) agar plates of SGal-Ura with or without 5 mM FeSO<sub>4</sub>. Plates were photographed after 4 days (control) or 5 days (with iron).

### **Iron measurement and Perls' staining**

To measure total iron, nodules were dried and mineralized in 1:1 volumes of nitric acid and hydrogen peroxide (30%), followed by quantitative analysis using the colorimetric chelator ferene (3-(2-pyridyl)-5,6(5-sulfo-2-furyl)-1,2,4-triazine). Iron staining of nodules was performed using the Perls' method, which stains non-haem iron (Meguro *et al.*, 2007). In brief, nodules were fixed in 4% (w/v) paraformaldehyde, then incubated with 1:1 volumes of 4% (w/v) potassium ferrocyanide and 4% (w/v) HCl for 1 h and washed with water. Wild-type nodules were additionally treated with 1:1 volumes of 4% (w/v) potassium ferricyanide and 4% (w/v) HCl for 40 h to stain haem iron in the infected cells. Tissue samples were embedded in 5% (w/v) agarose and sectioned with a VT1200 vibratome (Leica). Images of the mounted sections were taken using a LEICA DM6000 microscope, with x20/0.7 air or x40/0.85 air objectives and a LEICA DFC420C colour camera.

### **Protein blot analysis**

Plant tissue (~10 mg) was homogenised with 0.4 ml of 10% (w/v) trichloroacetic acid in acetone at 4°C. After incubation at -20°C for 1 h, the sample was centrifuged at 16,000 x g, 4°C, for 10 min. The pellet was washed 3 times with cold acetone, dried and dissolved in 50 µl Laemmli buffer (125 mM Tris-HCl pH 6.8, 2% (w/v) sodium dodecyl sulphate, 10% (v/v) glycerol, 5% (v/v) 2-mercaptoethanol and 0.04% (w/v) bromophenol blue). Samples (10 µl) were separated by SDS-PAGE and transferred under semi-dry conditions to nitrocellulose membrane. Ponceau-S staining of the membranes was used to confirm equal protein loading and successful transfer. The membrane was blocked in Tris-buffered saline (TBS) containing 0.1% (v/v) Tween-20 and 5% (w/v) skimmed dried milk (TBS-TM) for 1 h. Antibodies were diluted 1:2000 – 1:5000 in TBS-TM and incubated with the membrane for 1 – 2 h. Membranes were washed in TBS-TM for 3 x 5 min, then incubated with horseradish peroxidase-conjugated anti-rabbit IgG for 45 min. After washing 4 x 5 min in TBS-T, the positive immunosignal was developed using ECL reagent and exposed to Amersham Hyperfilm MP (GE Healthcare). Polyclonal antibodies against *Pisum sativum* ferritin (product number AS15 2898) and Arabidopsis hemoglobin 2

(AHB2, product number AS13 2745) were from Agrisera, Vännas, Sweden. Both antibodies are known to cross-react with their target in a range of other plant species.

## References

- Horvath B, Domonkos A, Kereszt A, Szucs A, Abraham E, Ayaydin F, Boka K, Chen Y, Chen R, Murray JD, et al. 2015.** Loss of the nodule-specific cysteine rich peptide, NCR169, abolishes symbiotic nitrogen fixation in the *Medicago truncatula* dnf7 mutant. *Proceedings of the National Academy of Sciences, USA* **112**: 15232–15237.
- Kim S, Punshon T, Lanzirotti A, Li LT, Alonso JM, Ecker JR, Kaplan J, Guerinot ML. 2006.** Localization of iron in *Arabidopsis* seeds requires the vacuolar membrane transporter VIT1. *Science* **314**: 1295–1298.
- Li L, Chen O, McVey Ward D, Kaplan J. 2001.** CCC1 is a transporter that mediates vacuolar iron storage in yeast. *Journal of Biological Chemistry* **276**: 29515–29519.
- Meguro R, Asoano Y, Odagiri S, Li C, Iwatsuki H, Shoumura K. 2007.** Nonheme-iron histochemistry for light and electron microscopy: a historical, theoretical and technical review. *Archives of Histology and Cytology* **70**: 1–19.
